# Supplementary material for: Antioxidant and Anti-Aging Phytoconstituents from Faucaria tuberculosa: In Vitro and In Silico Studies
Source: MDPI journal article supplement (doi:10.3390/molecules28196895), 2023-09-30
Supplement: s1 [file s1]

## Supplementary Material

### Antioxidant and Anti-aging Phytoconstituents from *Faucaria tuberculosa*: *in vitro* and *in silico* studies

Hayam S. Ahmed<sup>1#</sup>, Hala Abouzeid<sup>2#</sup>, Mostafa A. Mansour<sup>3</sup>, Asmaa I. Owis<sup>1,4</sup>, Elham Amin<sup>1,5\*</sup>, Hany W. Darwish<sup>6</sup>, Ashwag S. Alanazi<sup>7</sup>, Ibrahim A. Naguib<sup>8</sup>, Naglaa Afifi<sup>1\*</sup>

<sup>1</sup>Department of Pharmacognosy, Faculty of Pharmacy, Beni-Suef University, Beni-Suef 62514, Egypt.

<sup>2</sup>Department of Pharmacognosy, Faculty of Pharmacy, Port Said University, Port Said 42515, Egypt

<sup>3</sup>Department of pharmaceutical chemistry, Faculty of Pharmacy, Nahda University, Beni-suef, Egypt.

<sup>4</sup>Department of Pharmacognosy, Faculty of Pharmacy, Heliopolis University for Sustainable Development, Cairo 11785, Egypt.

<sup>5</sup>Department of Medicinal Chemistry and Pharmacognosy, College of Pharmacy, Qassim University, Buraydah 51452, Saudi Arabia.

<sup>6</sup> Department of Pharmaceutical Chemistry, College of Pharmacy, King Saud University, Riyadh 11451, Saudi Arabia.

<sup>7</sup>Department of Pharmaceutical Sciences, College of Pharmacy, Princess Nourah bint Abdulrahman University, Riyadh 11671, Saudi Arabia.

<sup>8</sup> Department of Pharmaceutical Chemistry, College of Pharmacy, Taif University, P.O. Box 11099, Taif 21944, Saudi Arabia.

### Abstract

The research targeting natural cosmeceuticals is now increasing due to the safety and/or limited side effects of natural products that are highly valued in cosmetology. In a research program aimed at exploring botanical sources for valuable skin-care antioxidant components, the current study investigated the phytochemical content and the biological potential of *Faucaria tuberculosa*. Phytochemical investigation of *F. tuberculosa* extract resulted in purification and characterization of six phytoconstituents including one new. The structure of the new constituent was elucidated as catechin-(2→1',4→2')-phloroglucinol (**4**). The structural identity of all isolated compounds were confirmed on the basis of extensive physical and spectral (1D, 2D-NMR and HRESIMS) investigations. The ethanolic extract exhibits a rich content of total phenolics (TPC) and total flavonoids (TFC) estimated as 32±0.034 mg GAE/g and 43± 0.004 mg RE/g, respectively. In addition, the antioxidant (ABTS and FRAP), antihyaluronidase and the antityrosinase activities of

all purified phytoconstituents were evaluated. The results noted phloroglucinol (**1**) and catechin-(2→1',4→2')-phloroglucinol (**4**) for remarkable antioxidant activity. While on the other side 3,5-dihydroxyphenyl  $\beta$ -D-glucopyranoside (**2**) achieved the most potent inhibitory activity against tyrosinase and hyaluronidase enzymes ( $IC_{50}$   $8.637 \pm 0.44$   $\mu$ g/ml and  $18.04 \pm 0.92$   $\mu$ g/ml, respectively) that was comparable to the standard drugs kojic acid ( $IC_{50}$   $9.267$   $\mu$ g/ml) and luteolin, ( $IC_{50}$   $33.25 \pm 1.69$   $\mu$ g/ml). Molecular docking study of 3,5-dihydroxyphenyl  $\beta$ -D-glucopyranoside (**2**) highlights its high potential to bind to the active sites of two enzymes involved in the study.

### Table of Contents

| No         | Content                                                       | Page        |
|------------|---------------------------------------------------------------|-------------|
| <b>S1</b>  | $^1H$ NMR spectrum of compound <b>1</b> (400 MHz, $CD_3OD$ ). | <b>S-3</b>  |
| <b>S2</b>  | DEPT-Q spectrum of compound <b>1</b> (100 MHz, $CD_3OD$ ).    | <b>S-4</b>  |
| <b>S3</b>  | $^1H$ NMR spectrum of compound <b>2</b> (400 MHz, $CD_3OD$ ). | <b>S-5</b>  |
| <b>S4</b>  | DEPT-Q spectrum of compound <b>2</b> (100 MHz, $CD_3OD$ ).    | <b>S-6</b>  |
| <b>S5</b>  | HMBC spectrum of compound <b>2</b>                            | <b>S-7</b>  |
| <b>S6</b>  | $^1H$ NMR spectrum of compound <b>3</b> (400 MHz, $CD_3OD$ ). | <b>S-8</b>  |
| <b>S7</b>  | Negative mode HR-ESI- MS spectrum of compound <b>4</b>        | <b>S-9</b>  |
| <b>S8</b>  | $^1H$ NMR spectrum of compound <b>4</b> (400 MHz, $CD_3OD$ ). | <b>S-10</b> |
| <b>S9</b>  | DEPT-Q spectrum of compound <b>4</b> (100 MHz, $CD_3OD$ ).    | <b>S-11</b> |
| <b>S10</b> | HSQC spectrum of compound <b>4</b>                            | <b>S-12</b> |
| <b>S11</b> | HMBC spectrum of compound <b>4</b>                            | <b>S-13</b> |
| <b>S12</b> | NOESY spectrum of compound <b>4</b>                           | <b>S-14</b> |
| <b>S13</b> | Expanded NOESY spectrum of compound <b>4</b> .                | <b>S-15</b> |
| <b>S14</b> | $^1H$ NMR spectrum of compound <b>5</b> (400 MHz, $CD_3OD$ ). | <b>S-16</b> |
| <b>S15</b> | DEPT-Q spectrum of compound <b>5</b> (100 MHz, $CD_3OD$ ).    | <b>S-17</b> |

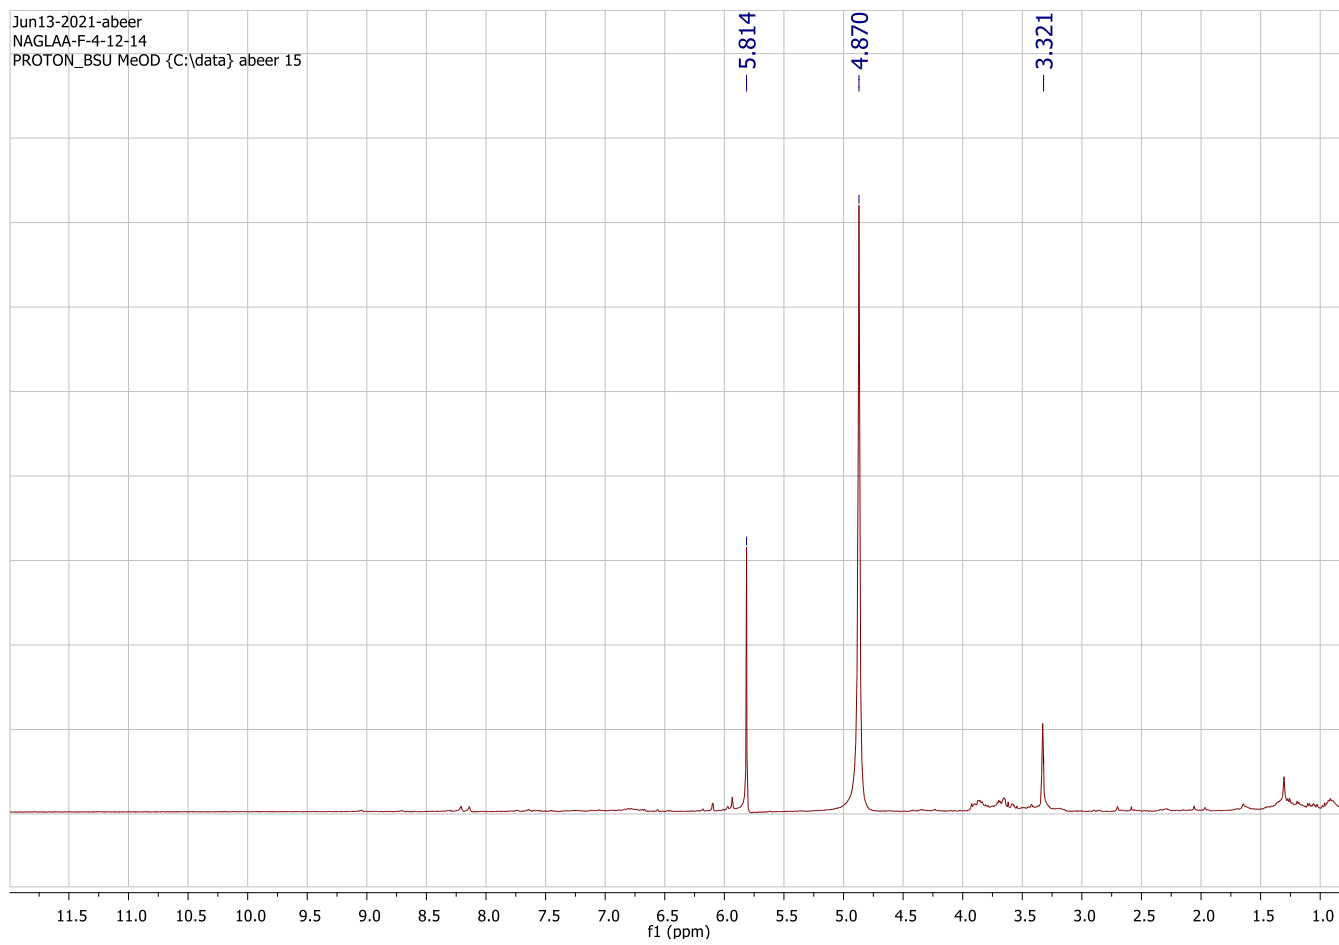

Figure S1:  $^1\text{H}$  NMR spectrum of compound 1 (400 MHz,  $\text{CD}_3\text{OD}$ ).

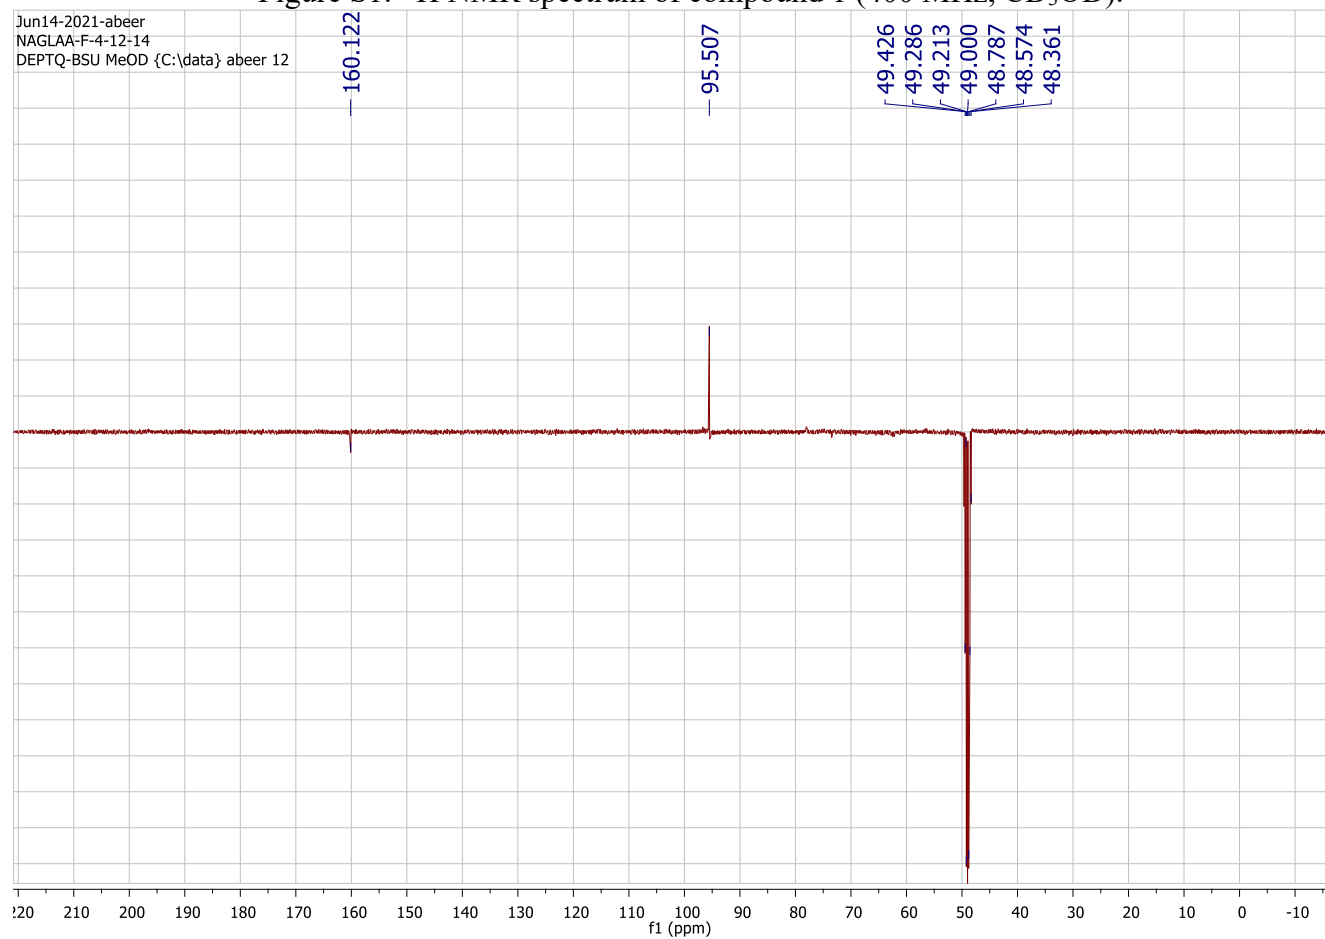

Figure S2: DEPT-Q spectrum of compound 1 (100 MHz,  $\text{CD}_3\text{OD}$ ).

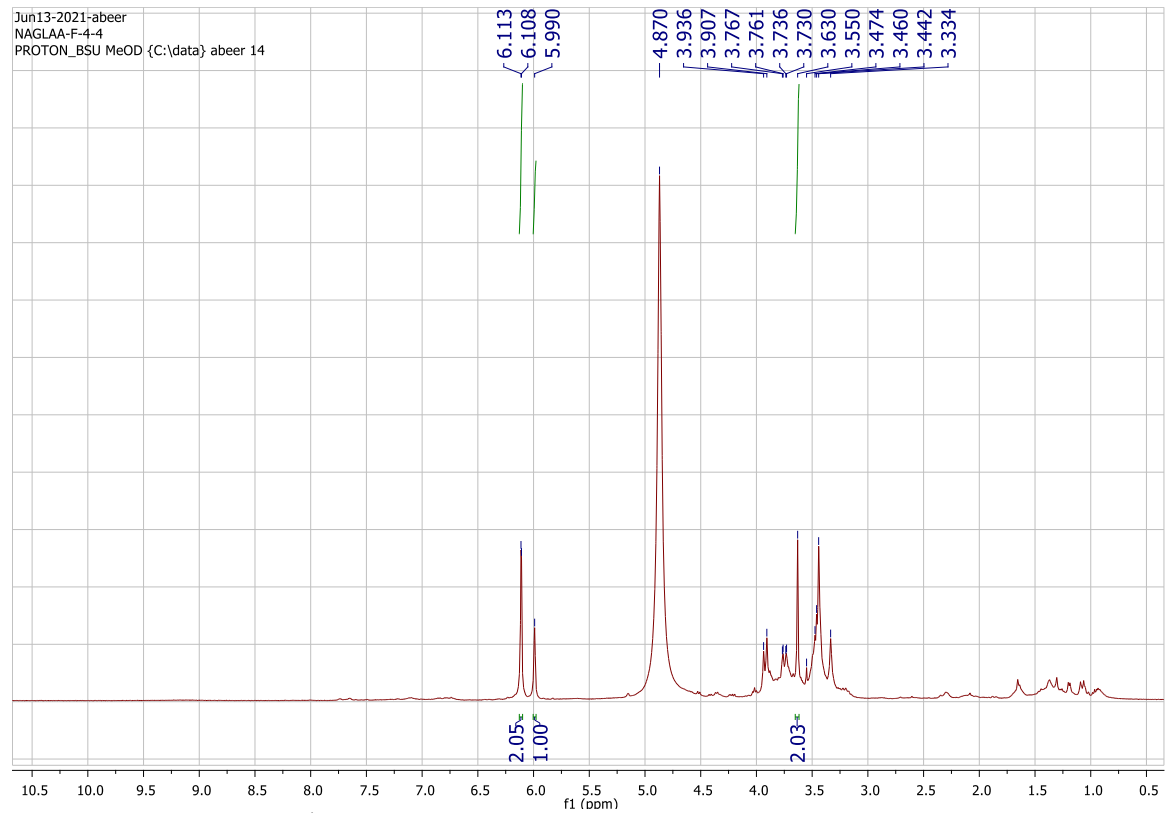

Figure S3:  $^1\text{H}$  NMR spectrum of compound 2 (400 MHz,  $\text{CD}_3\text{OD}$ ).

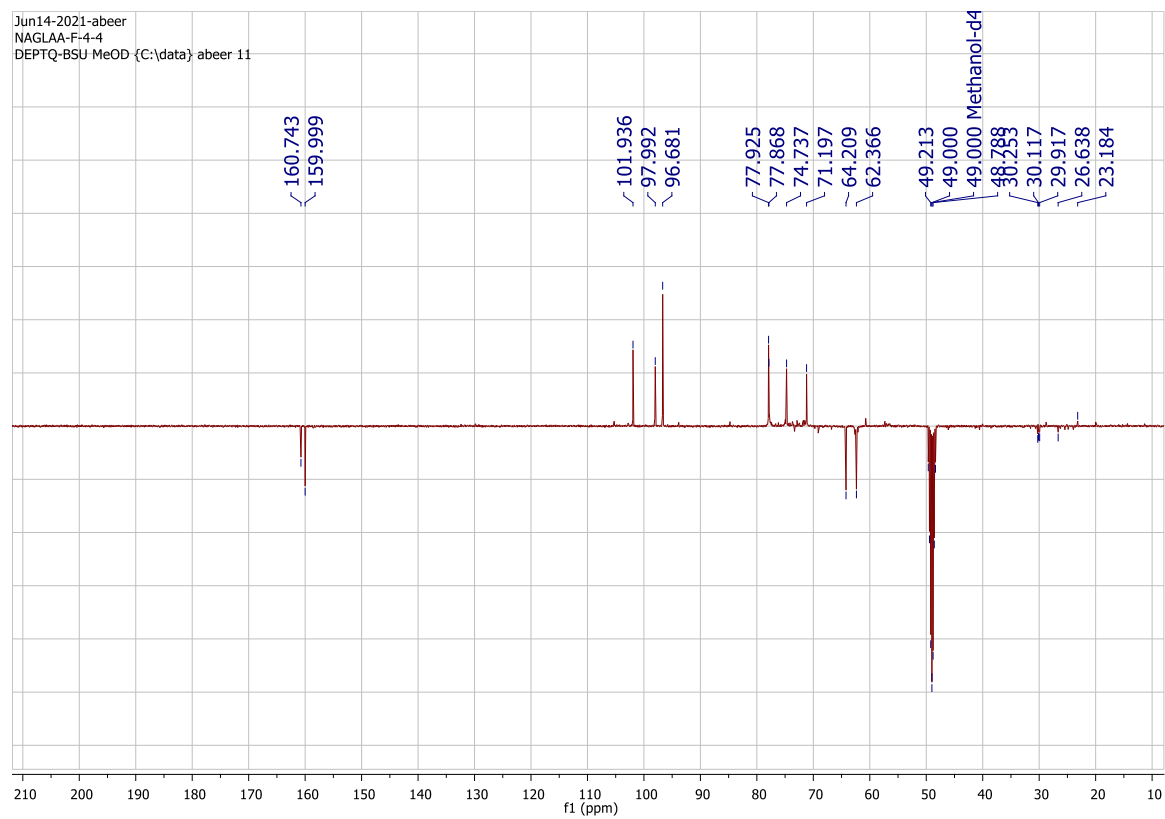

Figure S4: DEPT-Q spectrum of compound **2** (100 MHz, CD<sub>3</sub>OD).

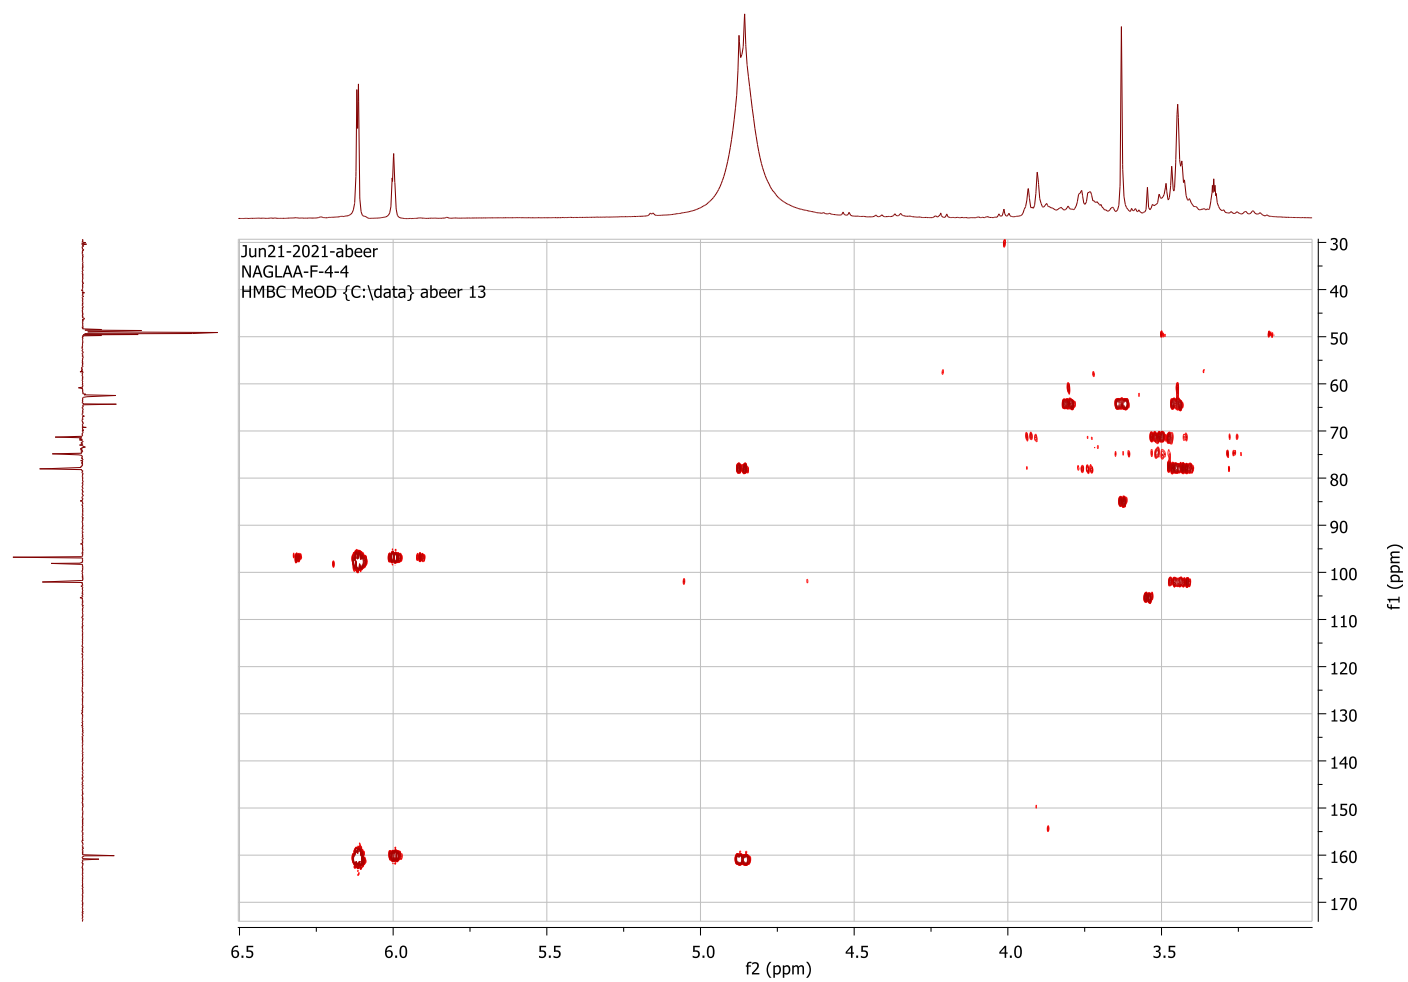

Figure S5: HMBC spectrum of compound **2**

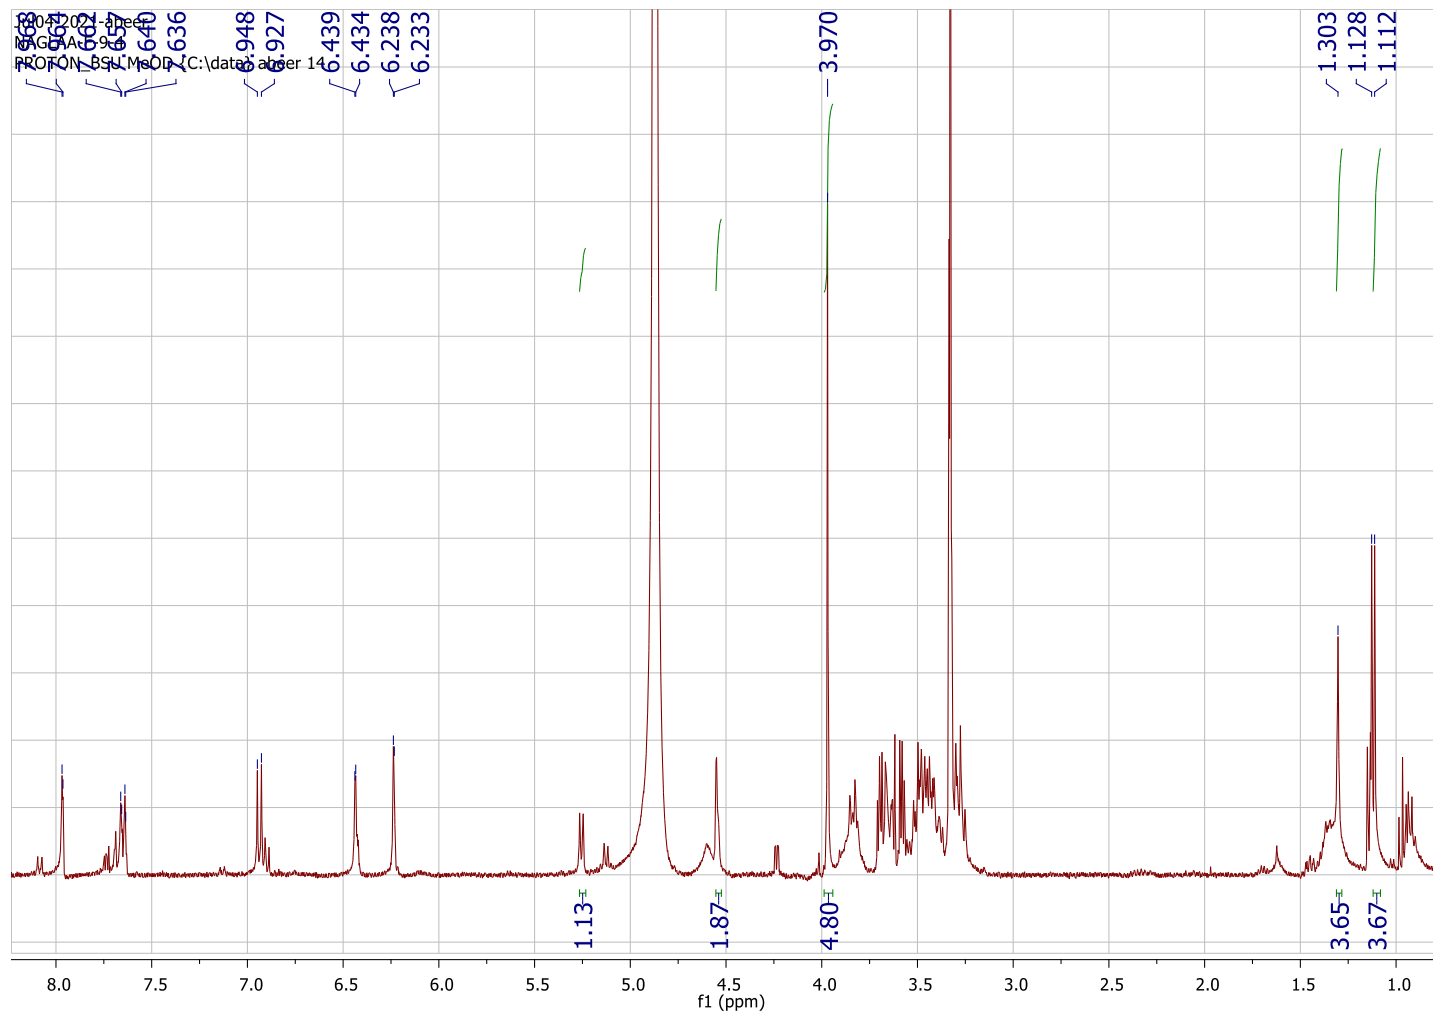

Figure S6:  $^1\text{H}$  NMR spectrum of compound 3 (400 MHz,  $\text{CD}_3\text{OD}$ ).



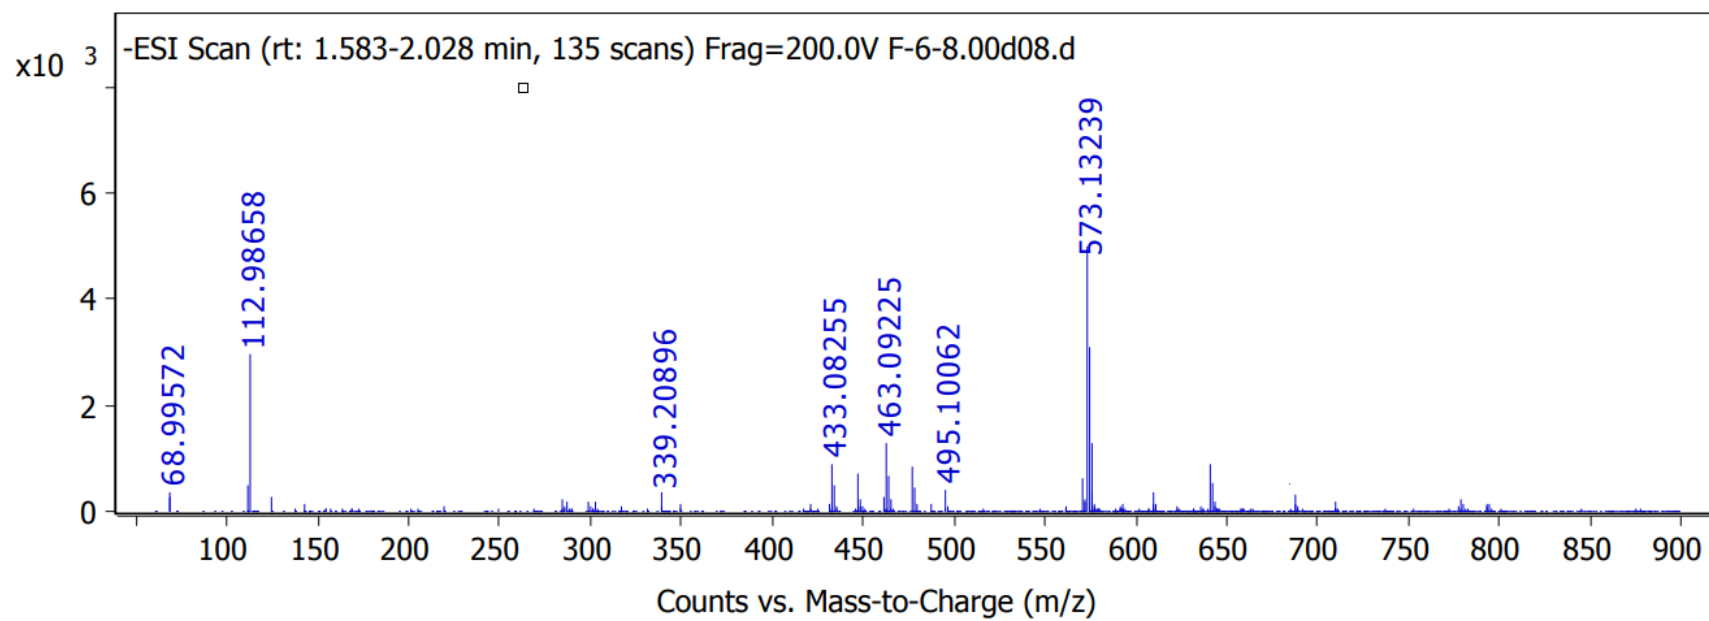

Figure S7: Negative mode HR-ESI- MS spectrum of compound **4**

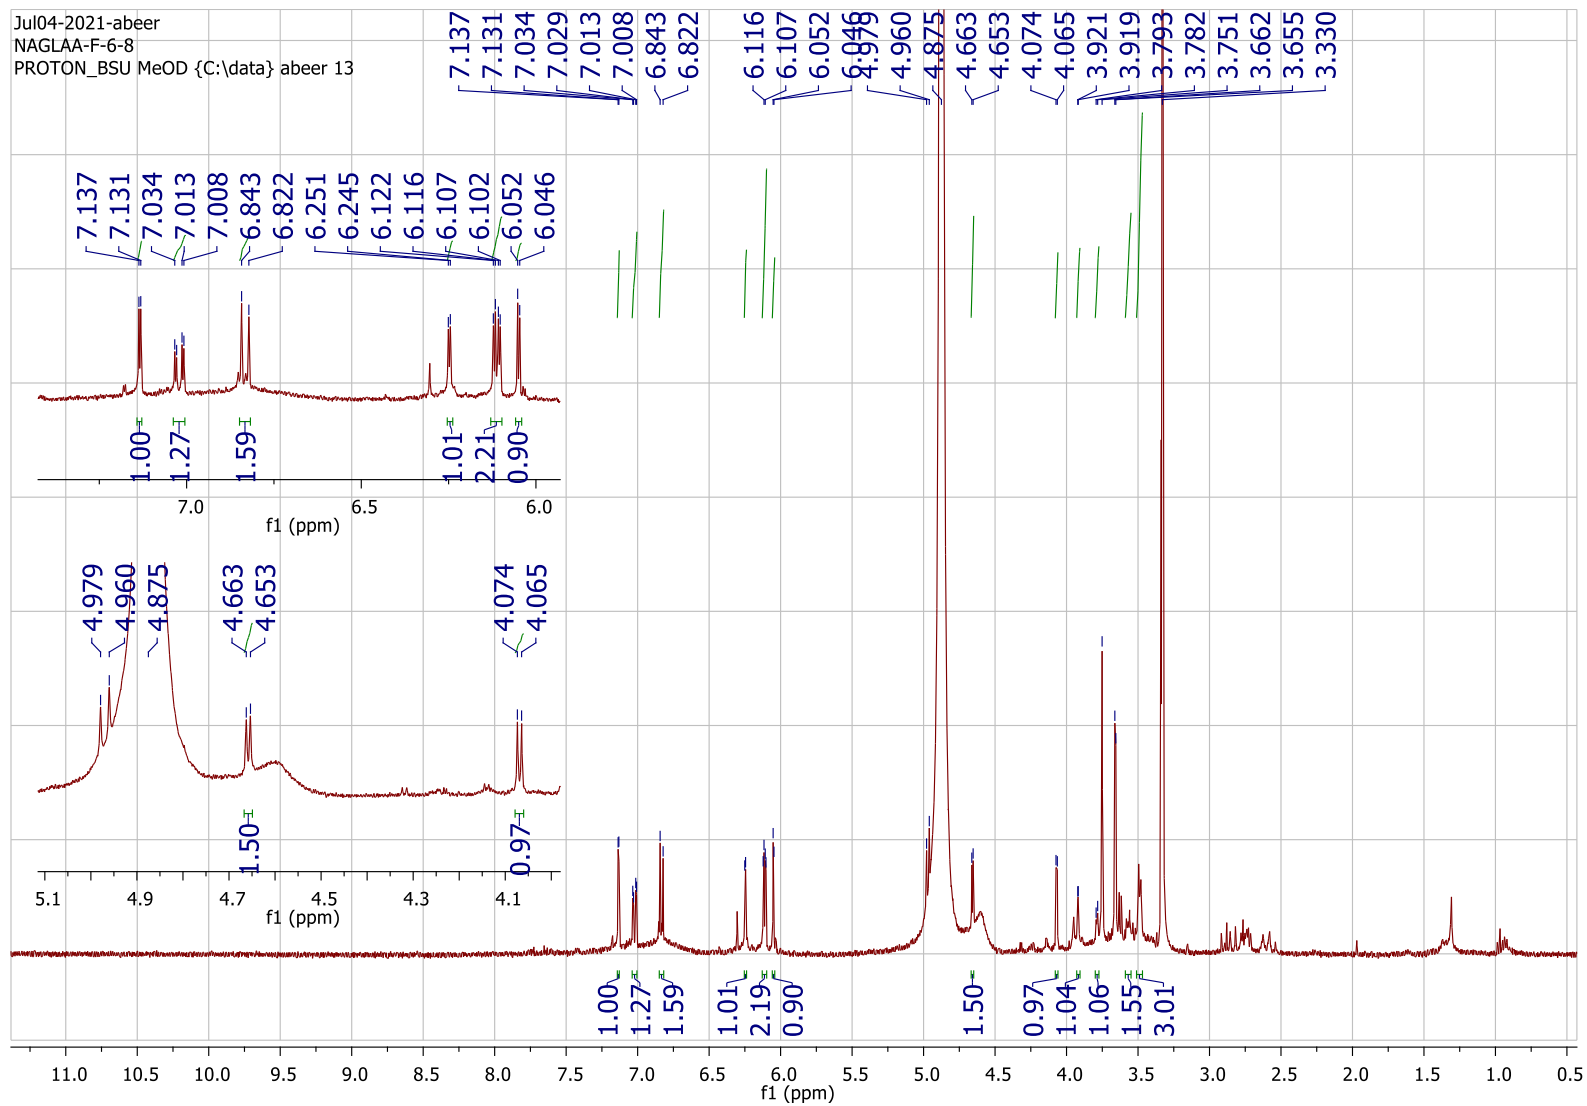

Figure S8:  $^1\text{H}$  NMR spectrum of compound 4 (400 MHz,  $\text{CD}_3\text{OD}$ ).

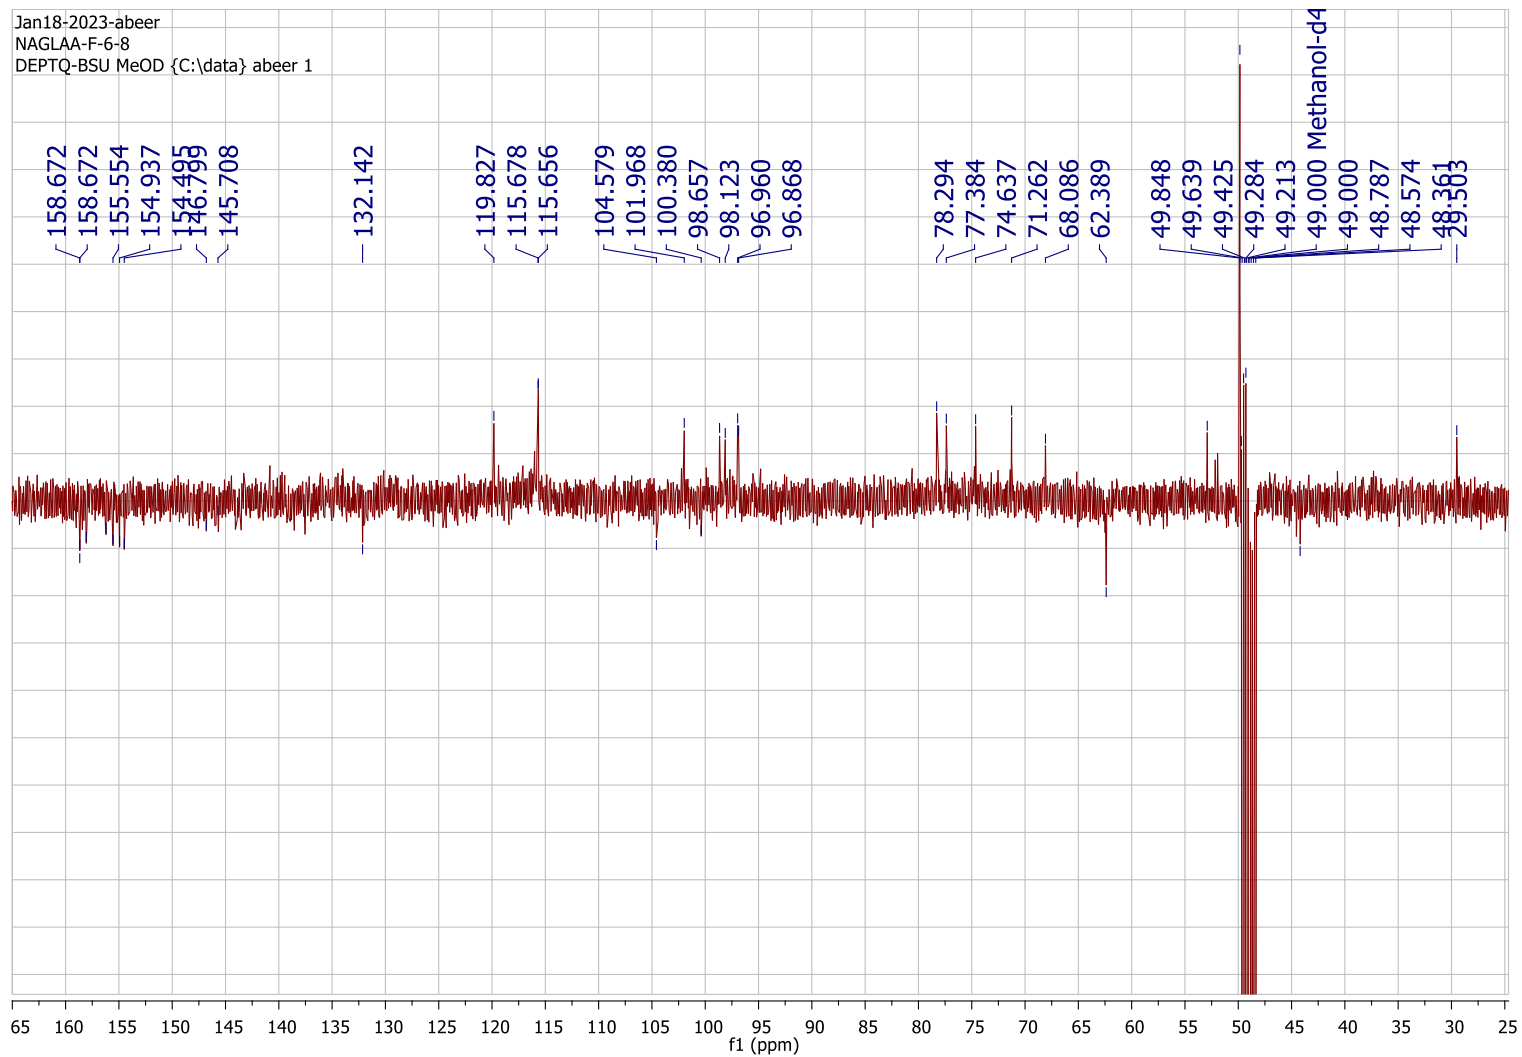

Figure S9: DEPT-Q spectrum of compound **4** (100 MHz, CD<sub>3</sub>OD).

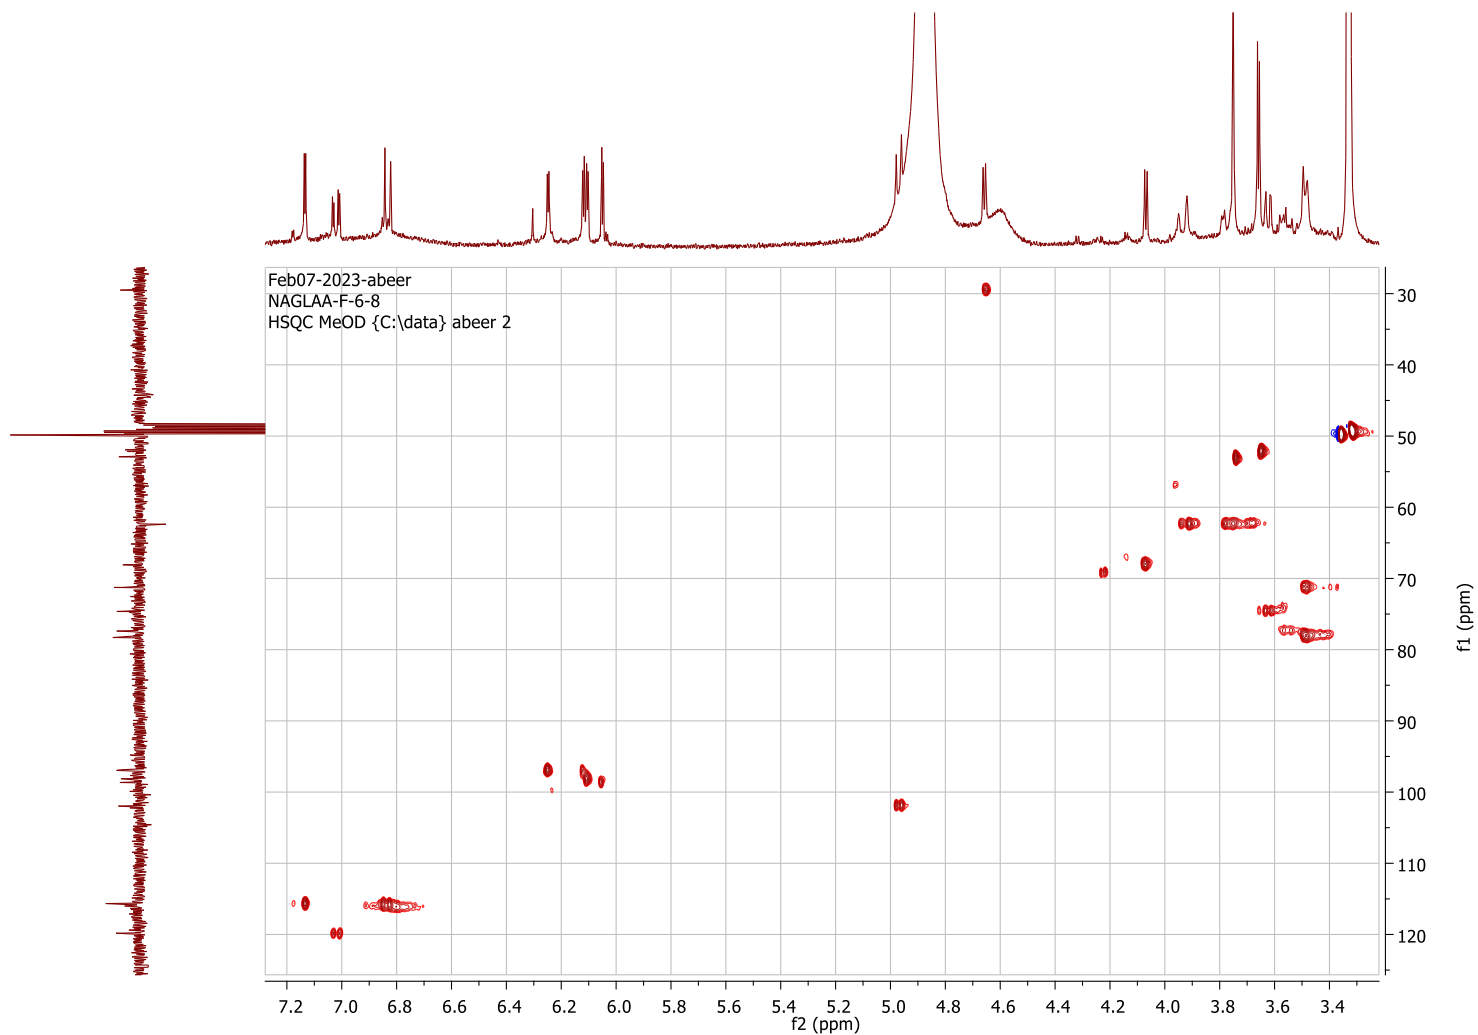

Figure S10: HSQC spectrum of compound **4**

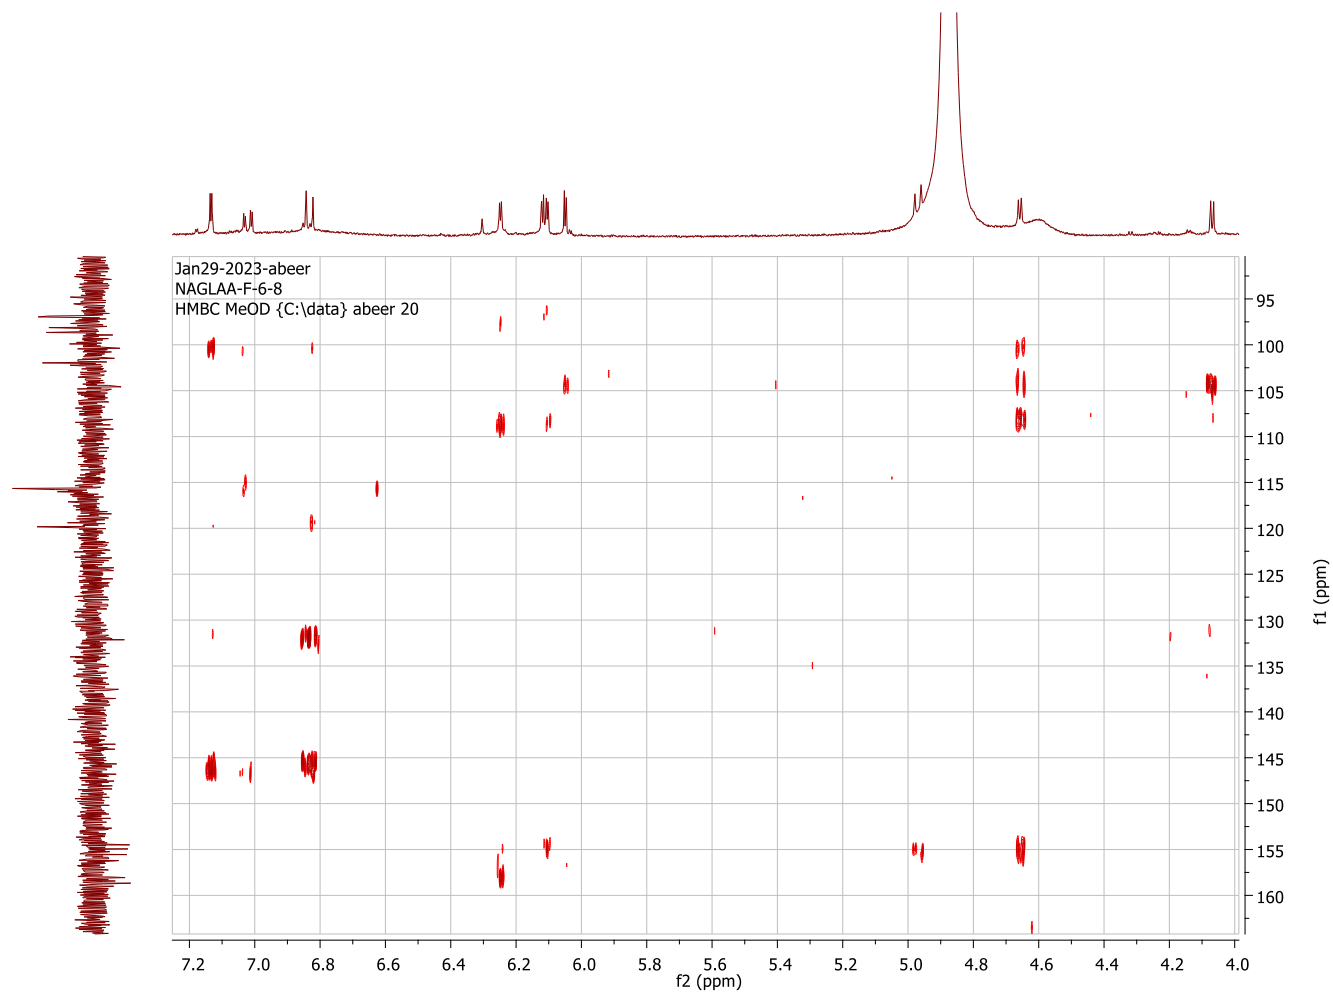

Figure S11: HMBC spectrum of compound **4**

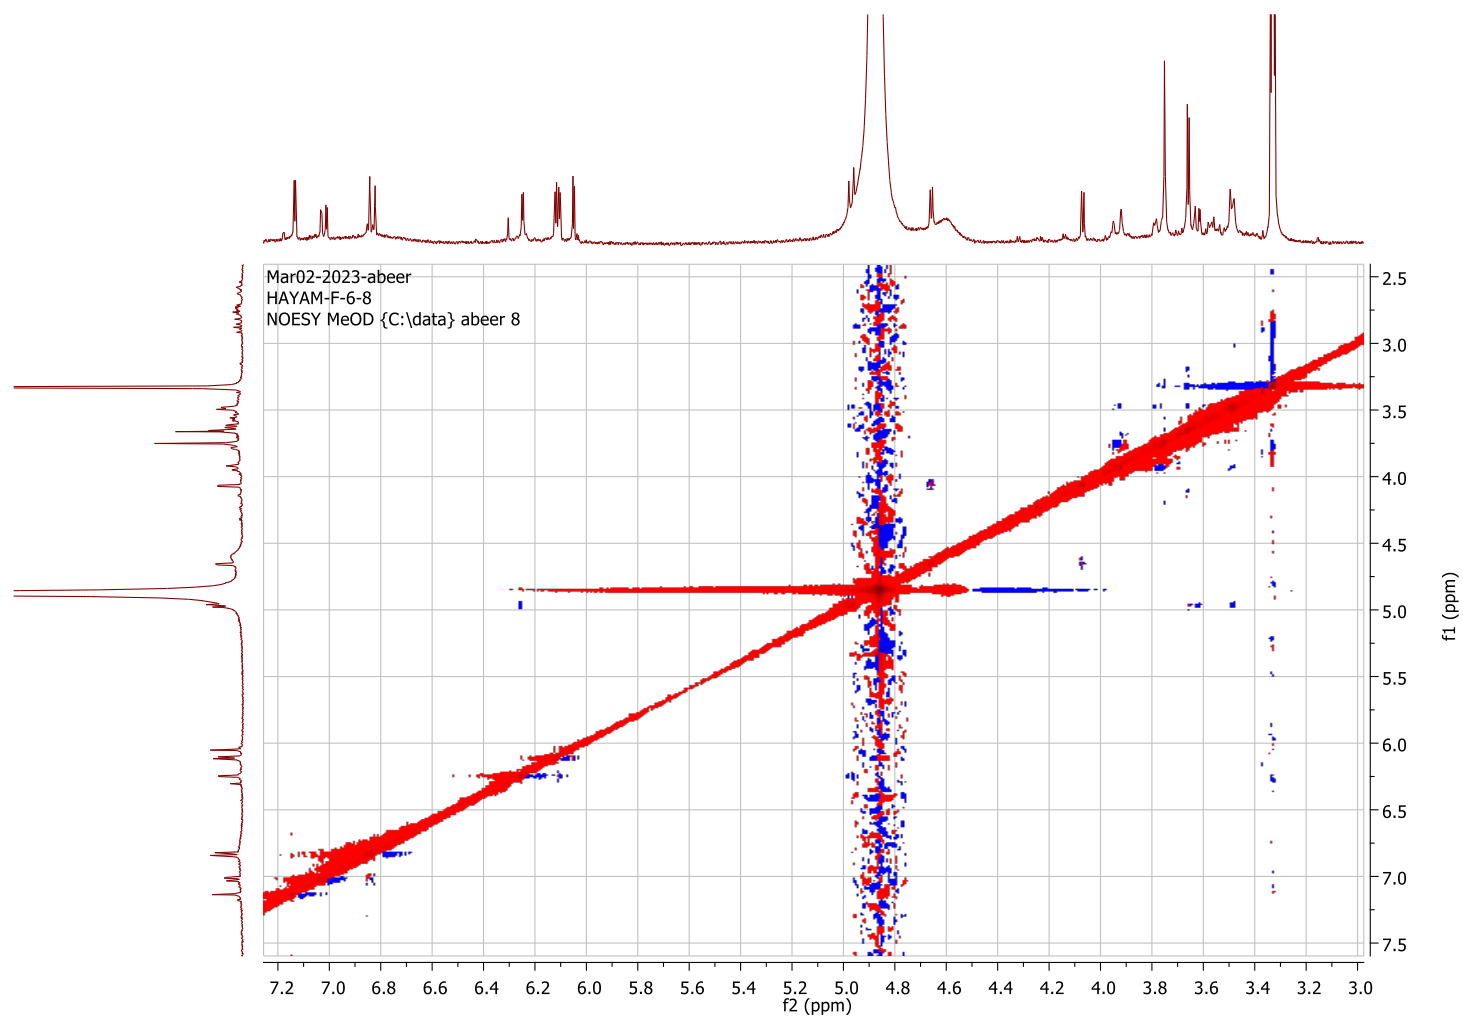

Figure S12: NOESY spectrum of compound 4

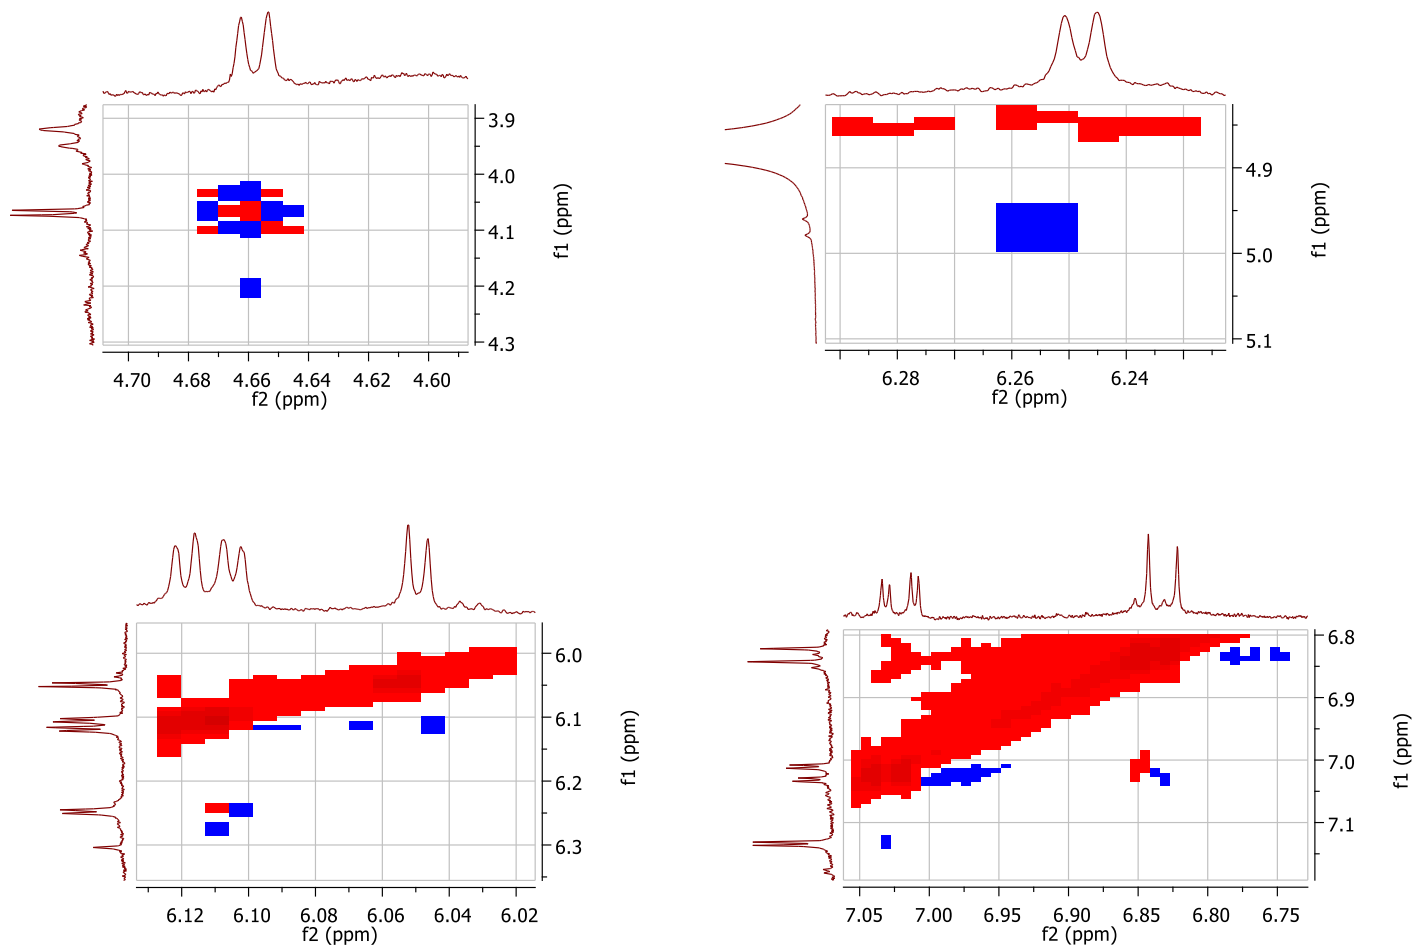

Figure S13: Expanded NOESY spectrum of compound 4

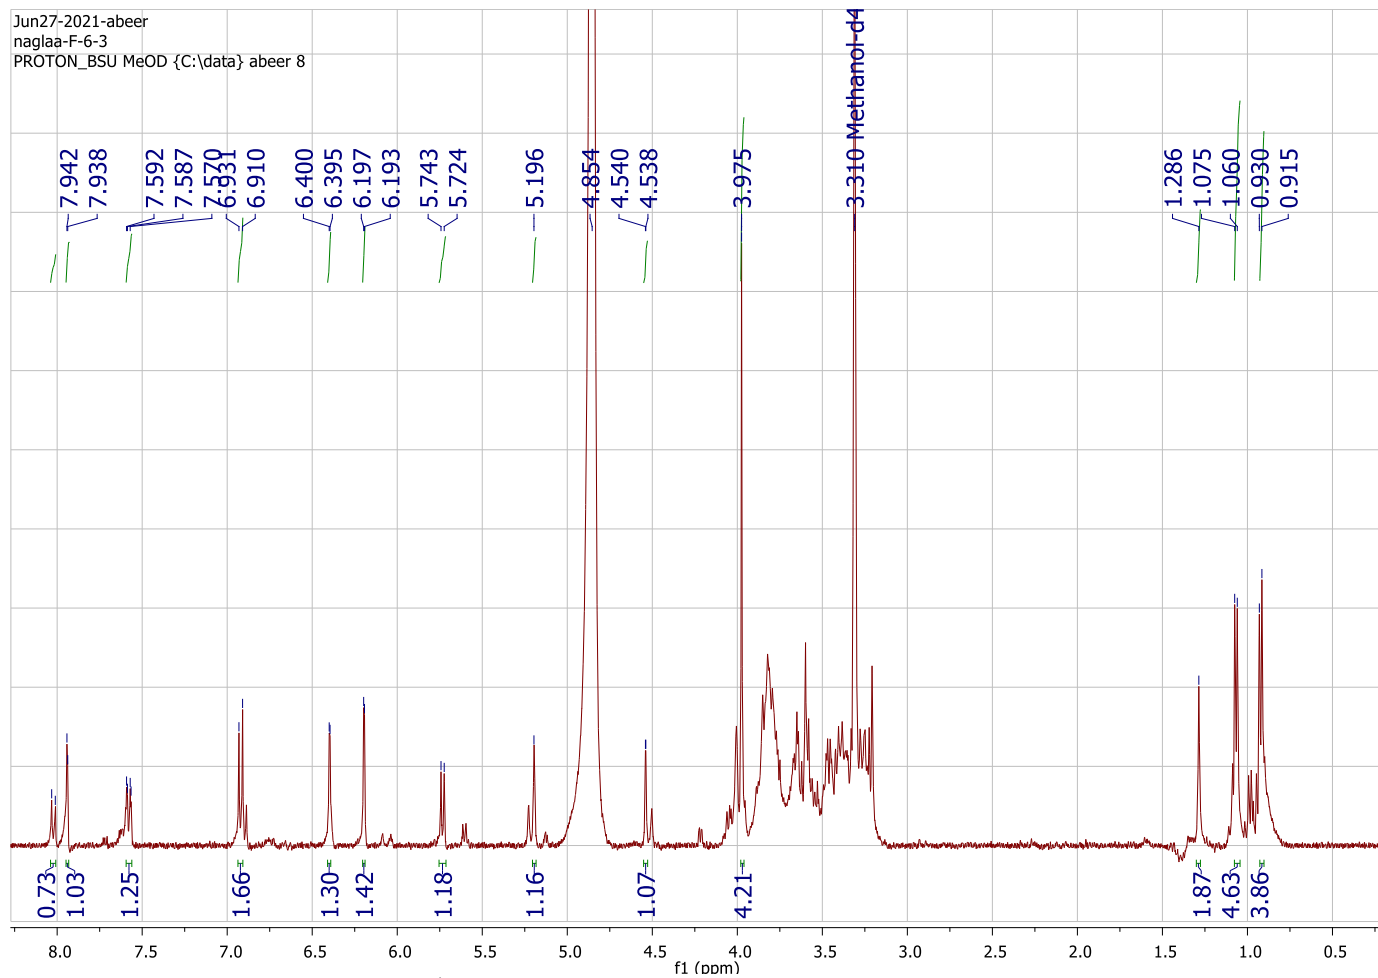

Figure S14:  $^1\text{H}$  NMR spectrum of compound 5 (400 MHz,  $\text{CD}_3\text{OD}$ ).



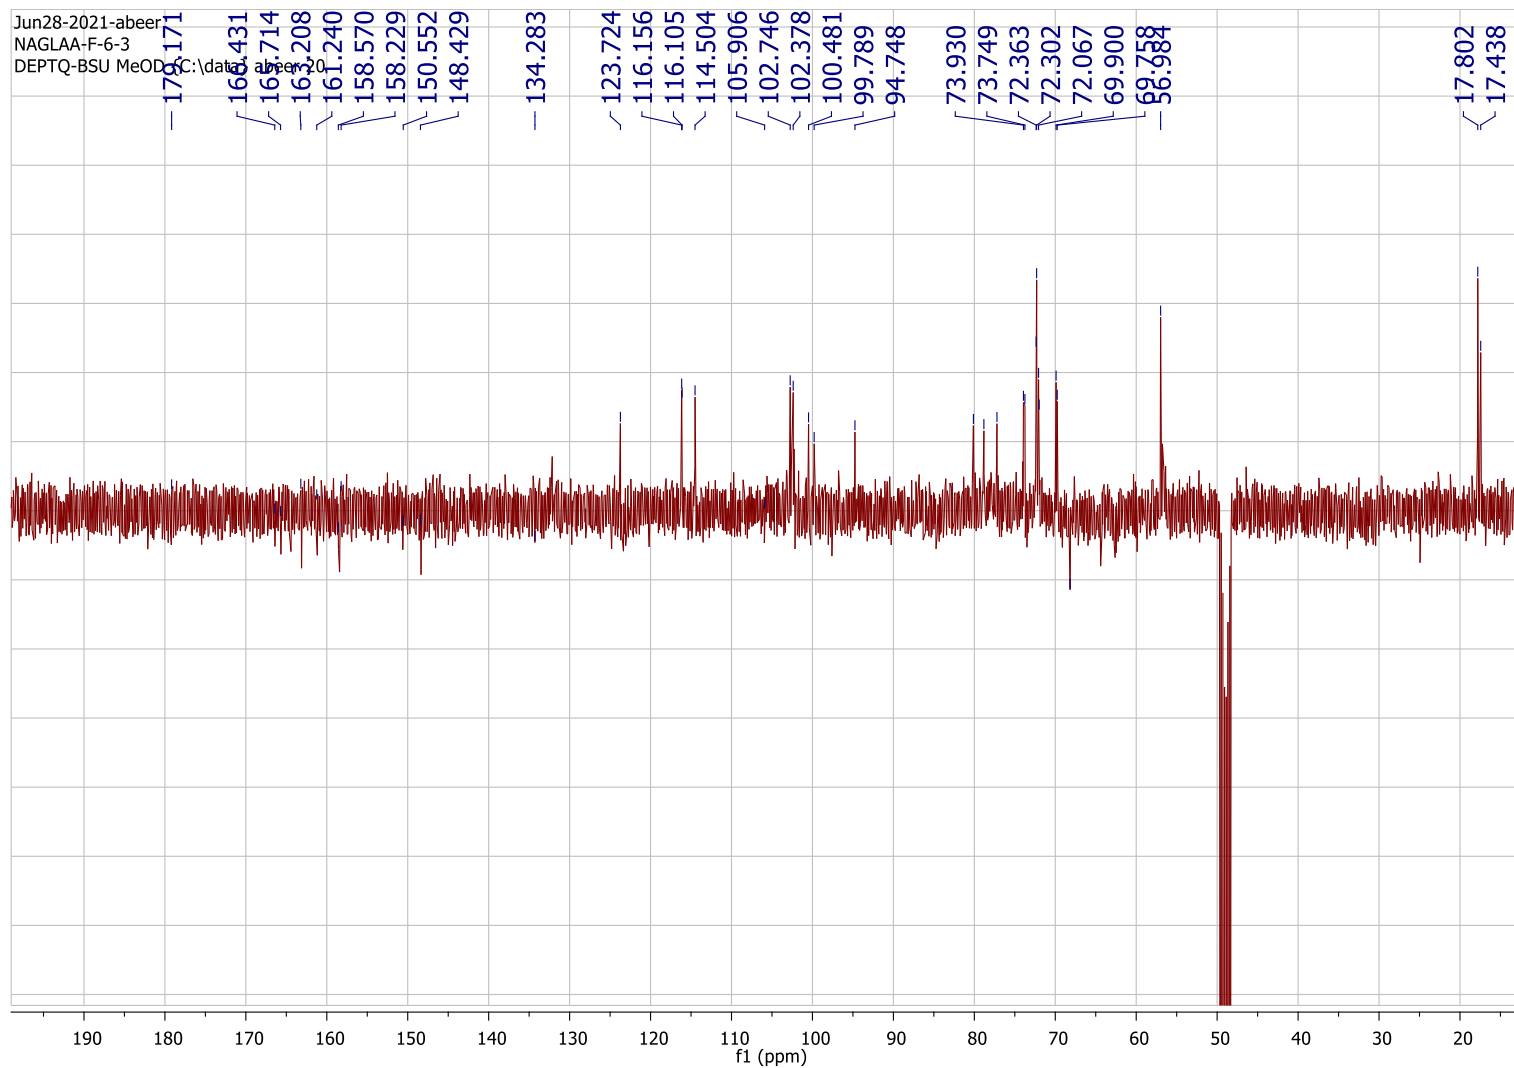

Figure S15: DEPT-Q spectrum of compound 5 (100 MHz, CD<sub>3</sub>OD).

NMR data for compounds: 1, 2, 3, 5 and 6 were included in supplementary data

**Compound 1: Phloroglucinol**

<sup>1</sup>H-NMR (400 MHz, MeOD-*d*<sub>4</sub>);  $\delta_{\text{H}}$  5.81 (3H, s, H-2, H-4, H-6. DEPT-Q NMR (101 MHz, MeOD-*d*<sub>4</sub>);  $\delta_{\text{C}}$  95.5 (C-1, C-3, C-5), 160.12(C-2, C-4, C-6) (Figure S1 and S2).

**Compound 2: 3,5-dihydroxyphenyl  $\beta$ -D-glucopyranoside (Phlorin);** <sup>1</sup>H-NMR (400 MHz, MeOD-*d*<sub>4</sub>);  $\delta_{\text{H}}$  6.09 (2H, d, 2, H-2 and H-6), 5.97 (1H, t, 2, H-4), 4.86 (1H, d, 7.6 Hz, H-1'), 3.61-3.42 (4H, m, H-2',3',4',5'), 3.72 (1H, dd, 12.1 and 2.4 Hz, H-6' a), 3.90 (1H, d, 11.6, H-6' b); DEPT-Q NMR (101 MHz, MeOD-*d*<sub>4</sub>);  $\delta_{\text{C}}$  160.7 (C-1), 159.99 (C-3 and C-5), 97.9 (C-4), 96.6 (C-2 and C-6), 101.9 (C-1'), 77.9 (*d*, C-5'), 77.8 (C-3'), 74.7 (C-2'), 71.2 (C-4'), 62.3 (C-6') (Figure S3 : S5).

**Compound 3: isorhamnetin 3-*O*-rutinoside;** <sup>1</sup>H-NMR (400 MHz, MeOD-*d*<sub>4</sub>);  $\delta_{\text{H}}$  7.94 (1H, d, 1.6, H-2'), 7.63 (1H, dd, 1.6, 8.4, H-6'), 6.91 (1H, d, 8.4, H-5'), 6.41 (1H, d, 2, H-8), 6.21 (1H, d, 2, H-6), 5.23 (1H, d, 7.6, H-1''), 4.53 (1H, br s, H-1'''), 3.2 - 3.7 (H-2''-H-6'', H-2'''-H-5'''), 1.09 (3H, d, 6.4, H-6''') (Figure S6).

**Compound 5: Isorhamnetin 3-*O*-[ $\alpha$ -rhamnopyranosyl-(1-4)- $\alpha$ -rhamnopyranosyl-(1-6)- $\beta$ -glucopyranoside];** <sup>1</sup>H-NMR (400 MHz, MeOD-*d*<sub>4</sub>);  $\delta_{\text{H}}$  7.94 (1H, d, 1.6, H-2'), 7.59 (1H, dd, 2, 8.8, H-6'), 6.92 (1H, d, 8.4, H-5'), 6.39 (1H, d, 2, H-8), 6.19 (1H, d, 2, H-6), 5.73 (1H, d, 7.6, H-1''), 5.19 (1H, br s, H-1'''), 4.54 (1H, br s, H-1'''), 3.97 (3H, s, OCH<sub>3</sub>), 3.00 - 4.00 (H-2''- H-6'', H-2'''-H-5''', H- 2''''-H-5'''), 1.06 (3H, d, 6, H-6'''), 0.92 (3H, d, 6, H-6'''). Multiplicities of most sugar resonances were not determined, because of signal overlap. DEPT-Q NMR (101 MHz, MeOD-*d*<sub>4</sub>);  $\delta_{\text{C}}$  158.5 (C-2), 134.2 (C-3), 179.2 (C-4), 163.2 (C-5), (99.8) (C-6), 166.4(C-7), 94.7 (C-8), 158.2 (C-9), 105.9 (C-10), 123.3 (C-1'), 114.5 (C-2'), 150.6 (C-3'), 148.3 (C-4'), 116.2 (C-5'), 123.7 (C-6'), 56.9 (OCH<sub>3</sub>), 102.7 (C-1''), 73.9 (C-2''), 78.8 (C-3''), 72.0 (C-4''), 77.2 (C-5''), 68.1 (C-6''), 102.3 (C-1'''), 72.3 (C-2'''), 72.3 (C-3'''), 80.1 (C-4'''), 69.8(C-5'''), 17.8 (C-6'''), 100.4 (C- 1'''), 72.1(C-2'''), 72.4(C- 3'''), 73.8 (C-4'''), 69.9 (C-5'''), 17.5(C-6''') (Figure S14 and S15).

**Compound 6:  $\beta$ -sitosterol;**  $^1\text{H}$  NMR (400 MHz,  $\text{CDCl}_3$ ) signals;  $\delta_{\text{H}}$ : 5.36 (d,  $J = 8$  Hz, H-6), 3.52 (m, H-3), 1.01 ( $\text{CH}_3$ -19), 0.93 ( $\text{CH}_3$ -21), 0.84 ( $\text{CH}_3$ -26), 0.83 ( $\text{CH}_3$ -27), 0.81 ( $\text{CH}_3$ -29), and 0.68 ( $\text{CH}_3$ -18); DEPT-Q NMR (101 MHz,  $\text{CDCl}_3$ )  $\delta_{\text{C}}$ : 37.2 (C-1), 31.6 (C-2), 71.8 (C-3), 42.2 (C-4), 140.7 (C-5), 121.7 (C-6), 31.9 (C-7), 31.9 (C-8), 50.1 (C-9), 36.5 (C-10), 21.06 (C-11), 39.7 (C-12), 42.19 (C-13), 56.8 (C-14), 24.4 (C-15), 28.9 (C-16), 55.9 (C-17), 12.04 (C-18), 19.5 (C-19), 36.1 (C-20), 18.9 (C-21), 33.9 (C-22), 26.2 (C-23), 45.8 (C-24), 29.3 (C-25), 20.0 (C-26), 19.2 (C-27), 23.3 (C-28), and 12.3 (C-29).
